# Supplementary material for: Transcription Factors Mcm1 and Sfp1 May Affect [PSI+] Prion Phenotype by Altering the Expression of the SUP35 Gene
Source: MDPI journal article supplement (doi:10.3390/microbiolres15020034), 2024-04-08
Supplement: s1 [file s1]

# Transcription factors Mcm1 and Sfp1 may affect $[PSI^+]$ prion phenotype by altering the expression of the *SUP35* gene.

Andrew G. Matveencko, Anastasiia S. Mikhailichenko, Polina B. Drozdova, Galina A. Zhouravleva

## Supplementary figures

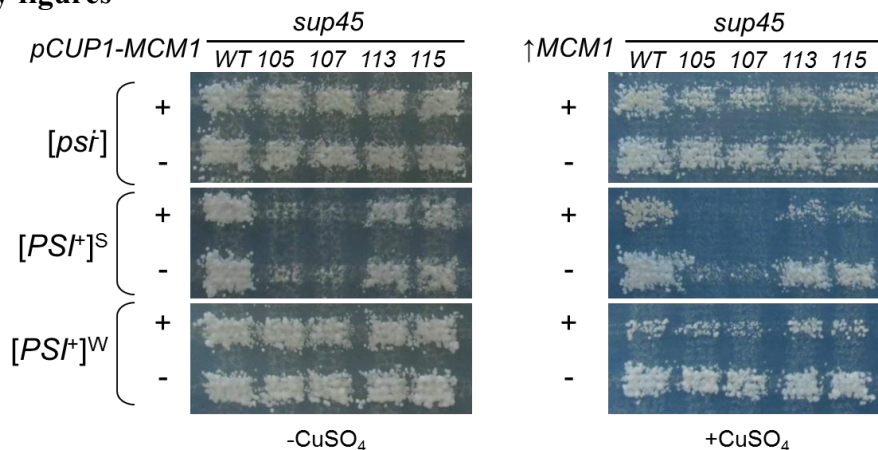

**Supplementary Figure S1.** The synthetic lethality of  $[PSI^+]$  with *sup45* mutations is increased upon *MCM1* transient overexpression. U-1A-D1628 derivatives containing *SUP45* (WT), *sup45-105*, *sup45-107*, *sup45-113*, or *sup45-115* allele (designated with the respective number) on *LEU2* vectors were mated to OT56 ( $[PSI^+]^S$ ), OT55 ( $[PSI^+]^W$ ), or 2-OT56 ( $[psi^-]$ ), each transformed with either pRS316CG (-) or pU-MCM1 (+). The selective medium for hybrid selection is SD supplemented only with adenine and tryptophan. 150  $\mu$ M  $CuSO_4$  was added to the media for the *CUP1* promoter induction. Representative crosses are shown. S – strong and W – weak variants of  $[PSI^+]$ , respectively.

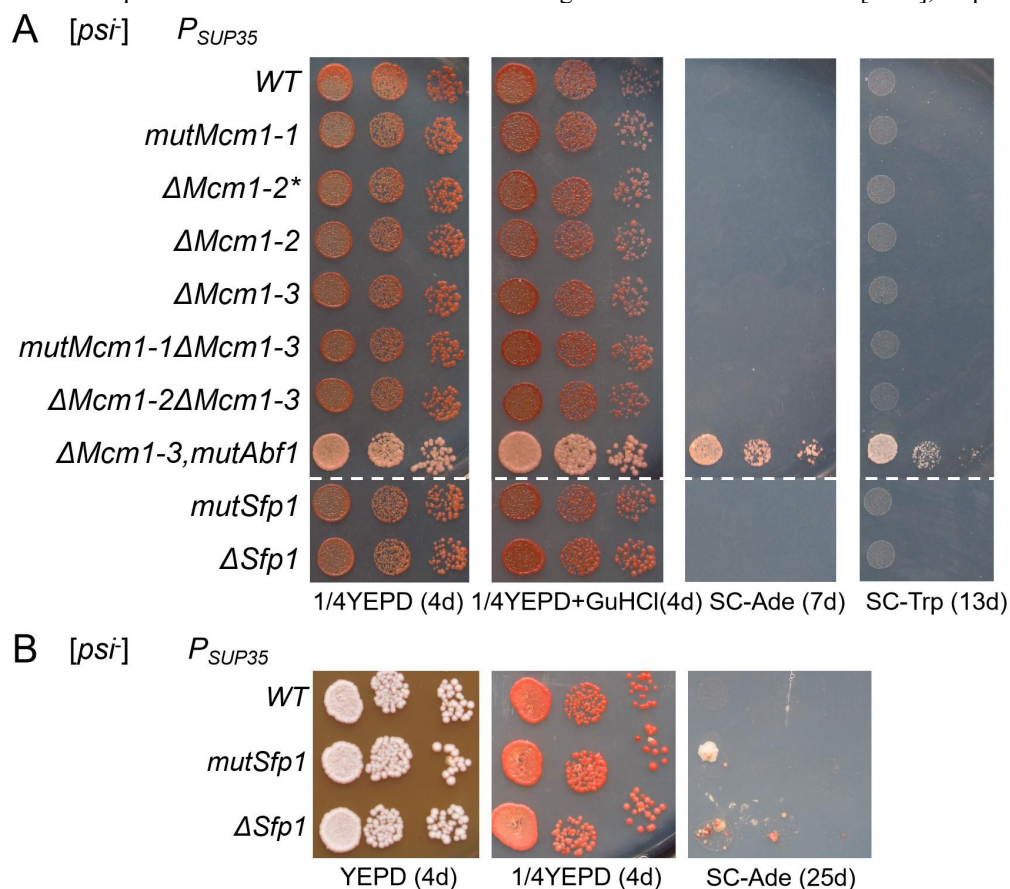

**Supplementary Figure S2.** Alterations in the potential Mcm1 TFBSs do not affect nonsense suppression in  $[psi^-]$  strains, while deletion of the potential Sfp1 binding site in the *SUP35* promoter leads to an extremely small increase in the nonsense suppression. Shown are representative tenfold serial dilutions of the derivatives of U-12-D1682 (A) or U-GT671 (B) with indicated *SUP35* promoter alleles.

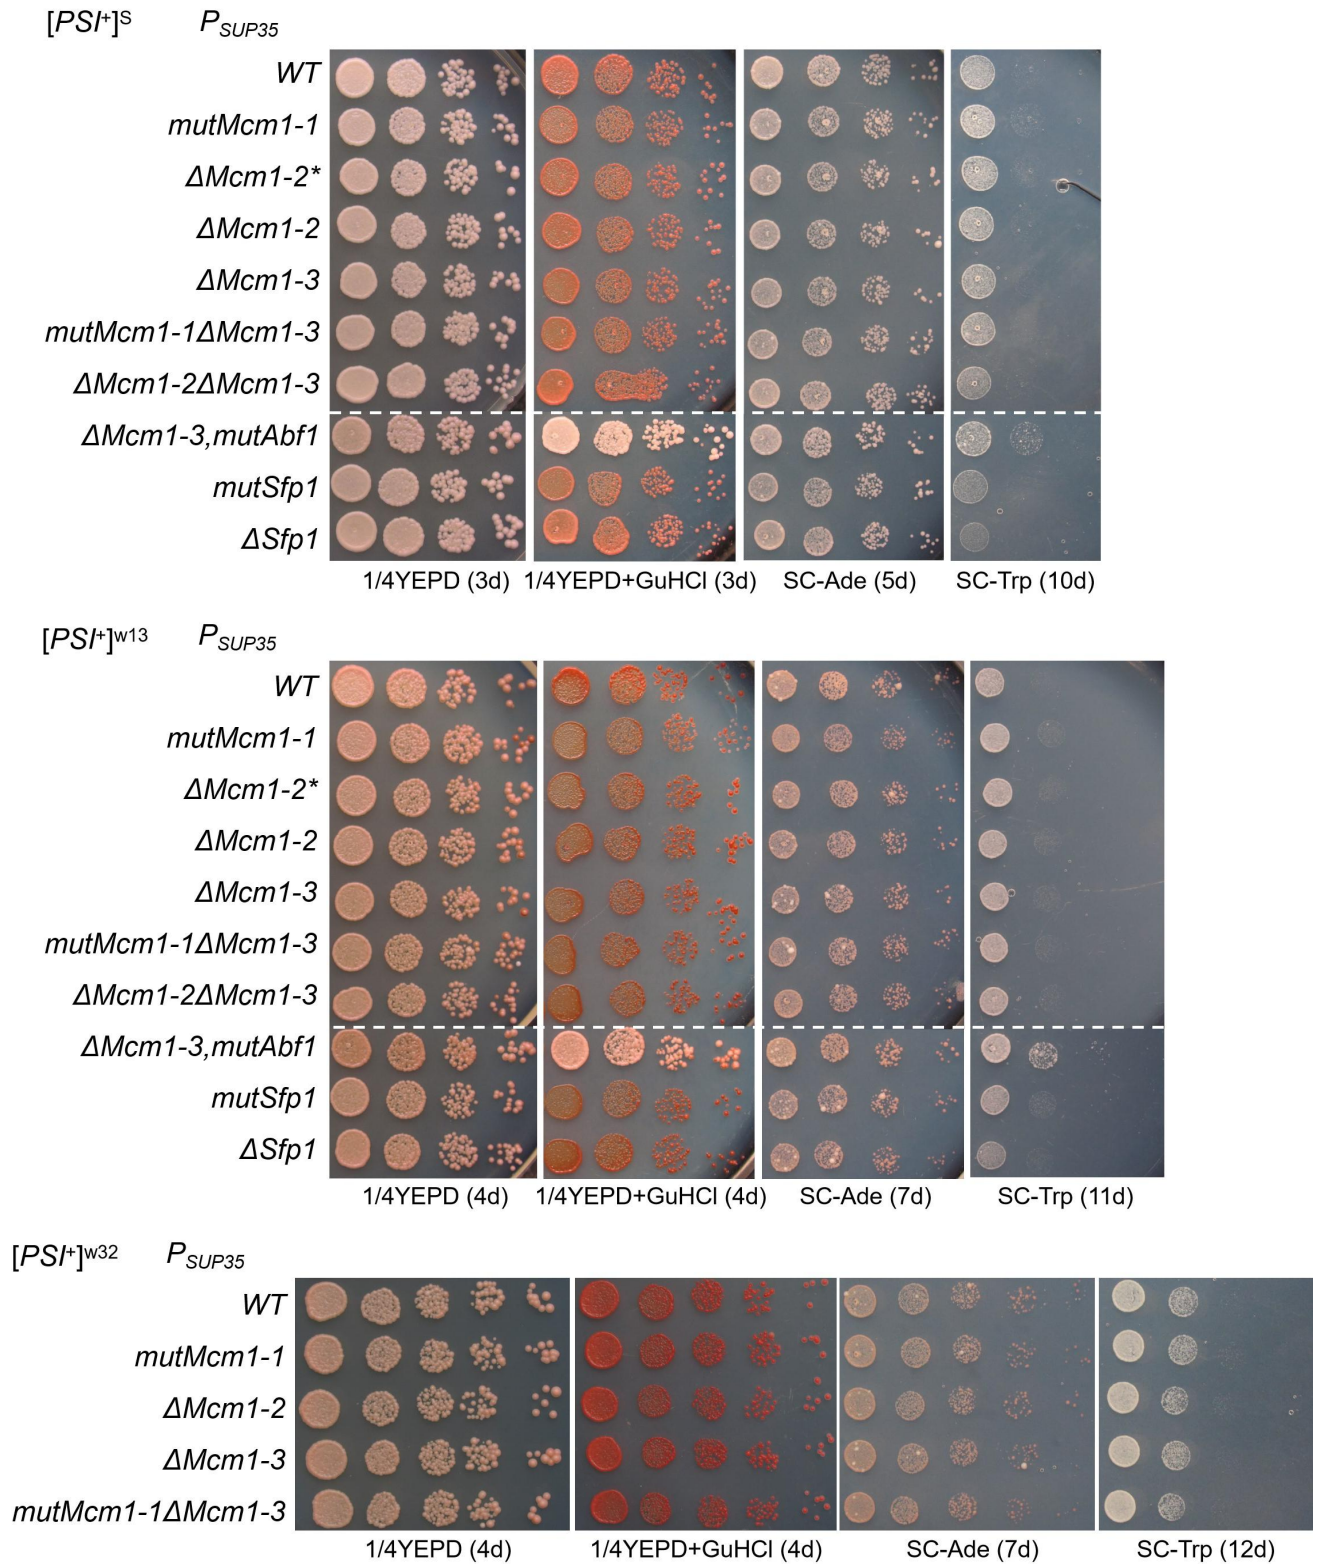

**Supplementary Figure S3.** Mutations and deletions of the potential TFBSs of Mcm1 and Sfp1 do not affect nonsense suppression in various [PSI<sup>+</sup>] strains. Shown are tenfold serial dilutions of the strains derived from U-P<sup>S</sup>-A-GT671 ([PSI<sup>+</sup>]<sup>S</sup>), w13-U-12-D1682 ([PSI<sup>+</sup>]<sup>w13</sup>), and w32-U-12-D1682 ([PSI<sup>+</sup>]<sup>w32</sup>) bearing indicated *SUP35* promoter variants.

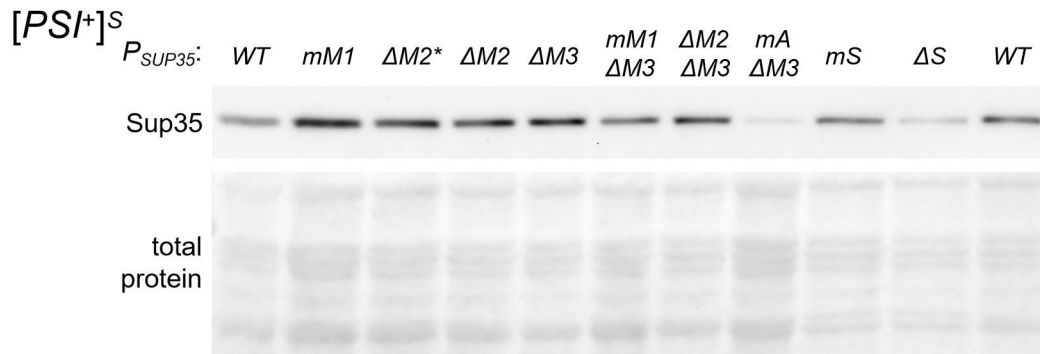

**Supplementary Figure S4.** Analysis of the Sup35 protein levels in U- $P^S$ -A-GT671 derivatives using SDS-PAGE, followed by Western blotting with anti-Sup35 antibodies. Coomassie R-250 staining (total protein) was used as a loading control. Promoter variants are denoted as on the Fig. 3B.

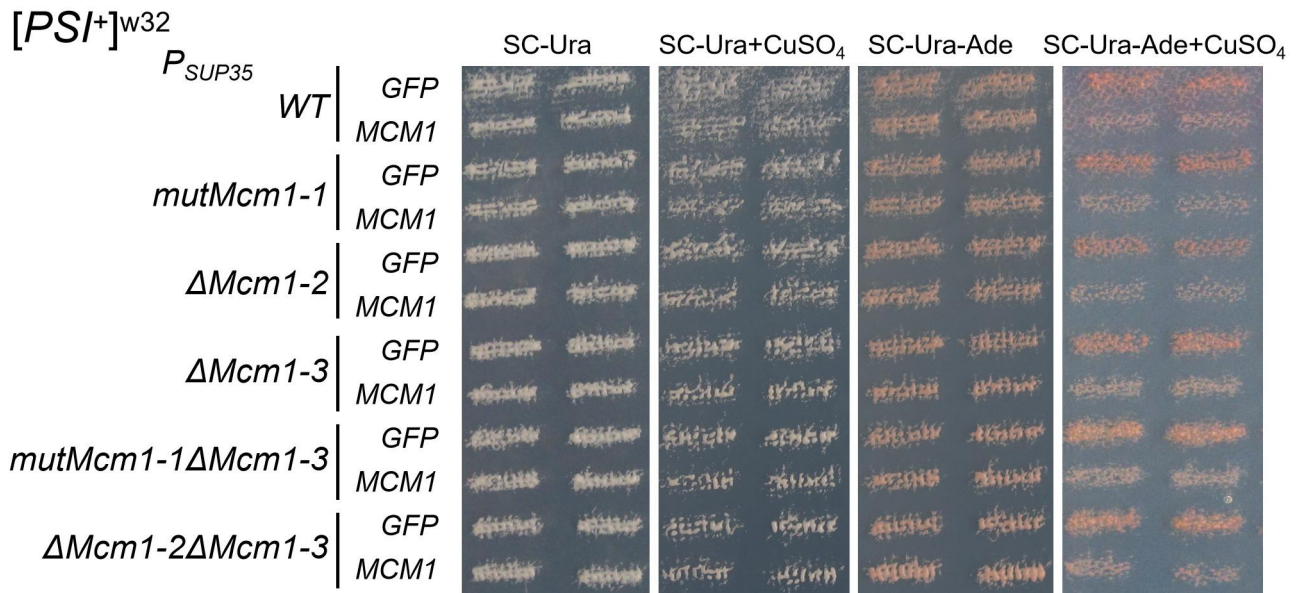

**Supplementary Figure S5.** Deletions and mutations of potential Mcm1 binding sites in the *SUP35* promoter do not affect the suppressor effect of Mcm1 overproduction. Derivatives of the w32-U-12-D1682 strain with *SUP35* under control of the mutant promoters were transformed with pRS316CG (*GFP*) or pU-MCM1 (*MCM1*). Obtained clones were replica plated onto the selective media, supplemented with CuSO<sub>4</sub> at a final concentration of 50  $\mu$ M where indicated. Shown is growth of two independent transformants per each combination of promoter and plasmid.

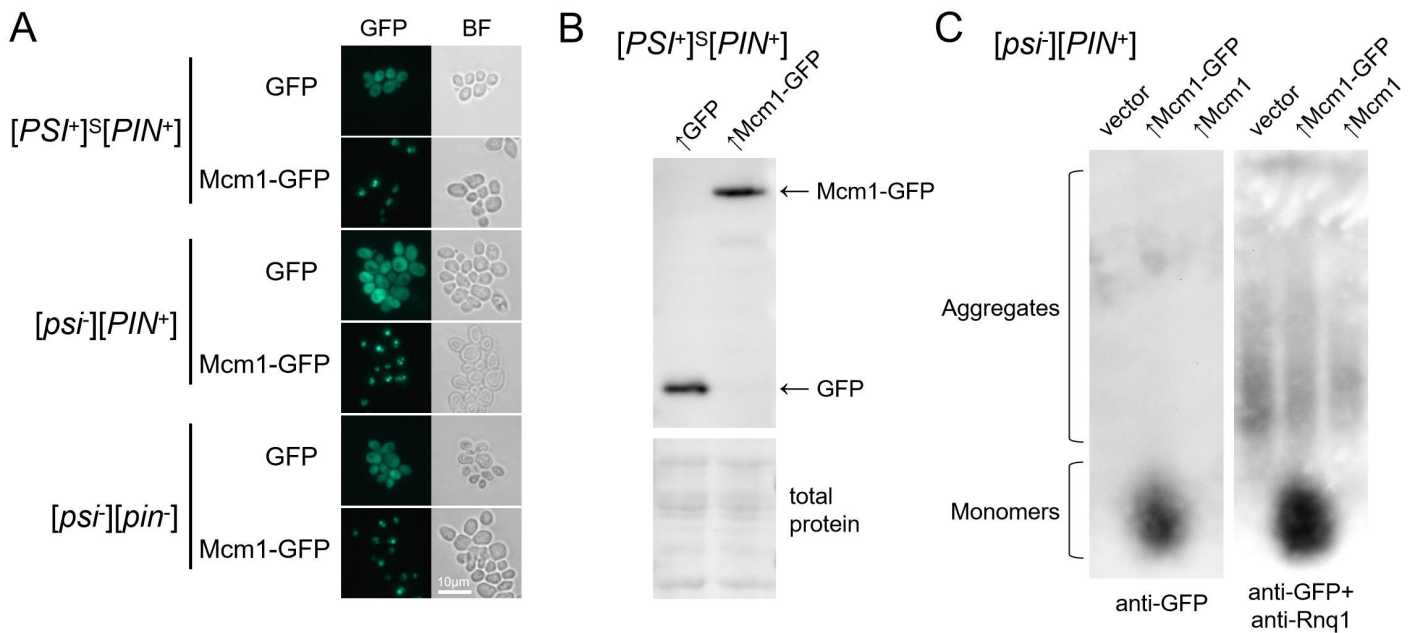

**Supplementary Figure S6.** The [PIN<sup>+</sup>] prion does not affect Mcm1 aggregation, and Mcm1 overproduction does not affect the [PIN<sup>+</sup>] prion. A. Fluorescence microscopy of the OT56 ([PSI<sup>+</sup>]<sup>S</sup>[PIN<sup>+</sup>]), 74-D694 ([psi-][PIN<sup>+</sup>]), and 2-74-D694 ([psi-][pin-]) cells transformed with either pRS316CG (GFP), or pUGC-MCM1-GFP (Mcm1-GFP) plasmid. BF, bright field. B. Analysis of the Mcm1-GFP protein levels in the OT56 strain transformed with plasmids from A using SDS-PAGE and Western blotting with anti-GFP antibodies. Coomassie R-250 staining was used to visualize total protein for a loading control. C. SDD-AGE analysis of the protein samples extracted from 74-D694 transformants, performed as in Fig. 5C. Western blotting was performed, first, with anti-GFP primary antibodies (anti-GFP), and then the same membrane was blotted using anti-Rnq1 antibodies (anti-GFP + anti-Rnq1).

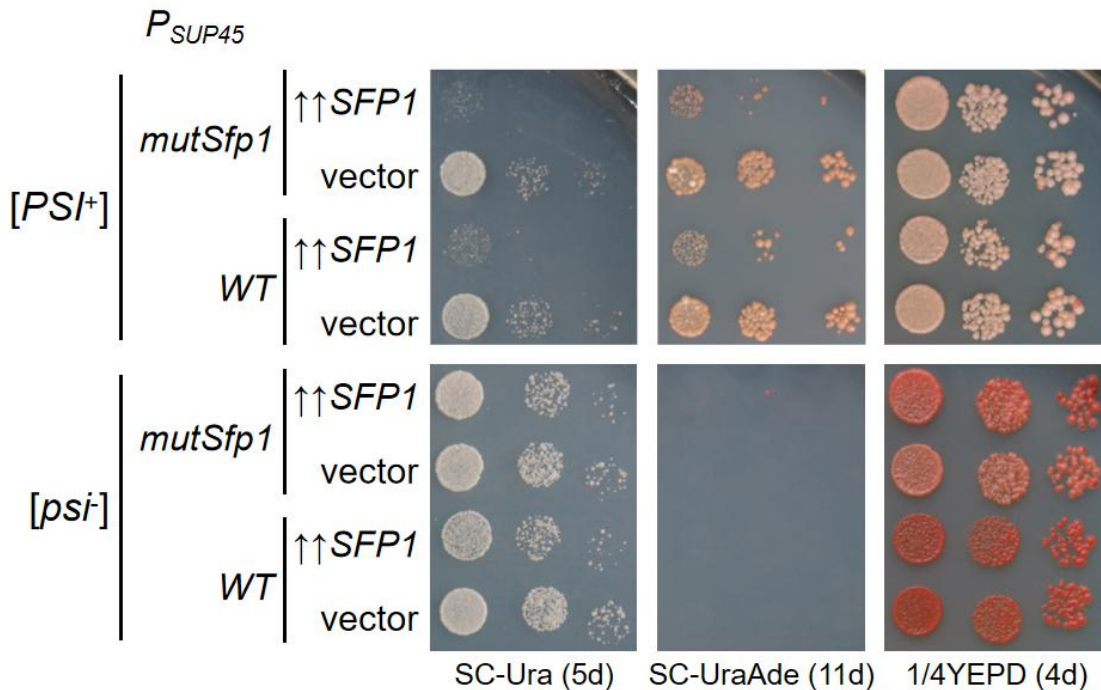

**Supplementary Figure S7.** Mutation of the potential Sfp1 binding site in the SUP45 promoter does not affect [PSI<sup>+</sup>] toxicity. The derivatives of P1-U-1A-D1628 or U-1A-D1628 with indicated  $P_{SUP45}$  variants were transformed with either pRS426-SFP1 (↑↑SFP1) or pRS426 (vector). Shown are tenfold serial dilutions of representative clones.

## Supplementary tables

**Supplementary Table S1.** Plasmids used in this work.

| Name                                   | Description                                                                                | Reference                 |
|----------------------------------------|--------------------------------------------------------------------------------------------|---------------------------|
| pRS316                                 | <i>CEN URA3</i>                                                                            | Sikorski & Hieter, 1989   |
| pRS316CG                               | <i>CEN URA3 P<sub>CUP1</sub>-GFP</i>                                                       | Serio et al., 1999        |
| pU-MCM1                                | <i>CEN URA3 P<sub>CUP1</sub>-MCM1</i>                                                      | Nizhnikov et al., 2013    |
| pUGC-MCM1-GFP                          | <i>CEN URA3 P<sub>CUP1</sub>-MCM1-GFP</i>                                                  | This work                 |
| pRS315CNMG                             | <i>CEN URA3 P<sub>CUP1</sub>*-SUP35NM-GFP</i>                                              | Danilov et al., 2019      |
| pYX242-Nab2NLS-2mCherry                | 2 $\mu$ <i>LEU2 P<sub>TP1</sub>-Nab2NLS-2mCherry</i>                                       | Malinowska et al., 2012   |
| pRS426                                 | 2 $\mu$ <i>URA3</i>                                                                        | Christianson et al., 1992 |
| pRS426-SFP1                            | 2 $\mu$ <i>URA3 P<sub>SFP1</sub>-SFP1</i>                                                  | Rogoza et al., 2010       |
| pRSU1                                  | <i>CEN LEU2 P<sub>SUP35</sub>-SUP35</i>                                                    | Volkov et al., 2002       |
| pRSU1-mutMcm1-1                        | <i>CEN LEU2 P<sub>SUP35-mutMcm1-1</sub>-SUP35</i>                                          | This work                 |
| pRSU1- $\Delta$ Mcm1-2                 | <i>CEN LEU2 P<sub>SUP35-<math>\Delta</math>Mcm1-2</sub>-SUP35</i>                          | This work                 |
| pRSU1- $\Delta$ Mcm1-2*                | <i>CEN LEU2 P<sub>SUP35-<math>\Delta</math>Mcm1-2*-SUP35</sub></i>                         | This work                 |
| pRSU1- $\Delta$ Mcm1-3                 | <i>CEN LEU2 P<sub>SUP35-<math>\Delta</math>Mcm1-3</sub>-SUP35</i>                          | This work                 |
| pRSU1- $\Delta$ Mcm1-3mutAbf1          | <i>CEN LEU2 P<sub>SUP35-mutAbf1<math>\Delta</math>Mcm1-3</sub>-SUP35</i>                   | This work                 |
| pRSU1- $\Delta$ Mcm1-3mutMcm1-1        | <i>CEN LEU2 P<sub>SUP35-mutMcm1-1<math>\Delta</math>Mcm1-3</sub>-SUP35</i>                 | This work                 |
| pRSU1- $\Delta$ Mcm1-3 $\Delta$ Mcm1-2 | <i>CEN LEU2 P<sub>SUP35-<math>\Delta</math>Mcm1-2<math>\Delta</math>Mcm1-3</sub>-SUP35</i> | This work                 |
| pRSU1-flipSfp1                         | <i>CEN LEU2 P<sub>SUP35-mutSfp1</sub>-SUP35</i>                                            | This work                 |
| pRSU1- $\Delta$ Sfp1                   | <i>CEN LEU2 P<sub>SUP35-<math>\Delta</math>Sfp1</sub>-SUP35</i>                            | This work                 |
| pRS315-SUP45                           | <i>CEN LEU2 P<sub>SUP45</sub>-SUP45</i>                                                    | Moskalenko et al., 2003   |
| pRS315-SUP45-flipSfp1                  | <i>CEN LEU2 P<sub>SUP45-flipSfp1</sub>-SUP45</i>                                           | This work                 |

**Supplementary Table S2.** Oligonucleotides used in this work.

| Name              | Sequence (5'-3')                                  | Constructed plasmids or qPCR target genes                                                        |
|-------------------|---------------------------------------------------|--------------------------------------------------------------------------------------------------|
| SUP35-mutMcm1-1-F | agttcatagcaaaattcttacgcaaatcatgaattcttagttctcagcc | pRSU1-mutMcm1-1,<br>pRSU1- $\Delta$ Mcm1-3<br>mutMcm1-1                                          |
| SUP35-mutMcm1-1-R | gctgagaactaagattcatgatttcgtaagaatttgcctatgaacttc  | pRSU1-mutMcm1-1,<br>pRSU1- $\Delta$ Mcm1-3<br>mutMcm1-1                                          |
| SUP35-delMcm1-2-F | atcttagttctcagcccaccgggtacatgctaagatcatac         | pRSU1- $\Delta$ Mcm1-2,<br>pRSU1- $\Delta$ Mcm1-2*,<br>pRSU1- $\Delta$ Mcm1-3<br>$\Delta$ Mcm1-2 |
| SUP35-delMcm1-2-R | gtatgatcttagcatgtaccgggtgggctgagaactaagat         | pRSU1- $\Delta$ Mcm1-2,<br>pRSU1- $\Delta$ Mcm1-2*,<br>pRSU1- $\Delta$ Mcm1-3<br>$\Delta$ Mcm1-2 |
| SUP35-delMcm1-3-F | catcgtataatatgatctttctagaaaaattttttcactcga        | pRSU1- $\Delta$ Mcm1-3,<br>pRSU1- $\Delta$ Mcm1-3mutAbf1                                         |
| SUP35-delMcm1-3-R | tcgagtgaaaaaaaatttctagaaagatcatattatagcatg        | pRSU1- $\Delta$ Mcm1-3,<br>pRSU1- $\Delta$ Mcm1-3<br>mutAbf1                                     |
| SUP35_flipSfp1-F  | atgatctttcttagtgagtttttaaaattcactcgaccaaagctccc   | pRSU1-flipSfp1                                                                                   |
| SUP35_flipSfp1-R  | gggagcttggctcgagtgaattttaaaaaactccataaagaagatcat  | pRSU1-flipSfp1                                                                                   |

|                  |                                                   |                       |
|------------------|---------------------------------------------------|-----------------------|
| SUP35_delSfp1-F  | tttctttatggagaattcactcgaccaagctccattgc            | pRSU1-ΔSfp1           |
| SUP35_delSfp1-R  | ggagctttggtcgcagtgattctccataaagaagatcat           | pRSU1-ΔSfp1           |
| SUP45_flipSfp1_F | attattccgttgaccctgaatgattttaaattcagaaatccagtgctaa | pRS315-SUP45-flipSfp1 |
| SUP45_flipSfp1_R | ttagcactggatttctgaattttaaatcattcagggtcaacggaataat | pRS315-SUP45-flipSfp1 |
| SUP35_F          | ACAACAAGGTAACAACAGATACC                           | SUP35 (qPCR)          |
| SUP35_R          | GGATTGAATTGCTGCTGATAAC                            | SUP35 (qPCR)          |
| SUP45_F          | CGATCCAAGACTAGCATGTAAG                            | SUP45 (qPCR)          |
| SUP45_R          | CTTGAACATACTTGACATTGGC                            | SUP45 (qPCR)          |
| ACT1_F           | TAACGGTTCTGGTATGTGTAAAGC                          | ACT1 (qPCR)           |
| ACT1_R           | GCTTCATCACCAACGTAGGAGTC                           | ACT1 (qPCR)           |

**Supplementary Table S3.** Yeast strains used in this work.

| Name                               | Description                                                                                                                          | Reference                                     |
|------------------------------------|--------------------------------------------------------------------------------------------------------------------------------------|-----------------------------------------------|
| 74-D694                            | <i>MATa ade1-14 his3-Δ200 ura3-52 leu2-3,112 trp1-289 [psi<sup>-</sup>] [PIN<sup>+</sup>]</i>                                        | Chernoff et al., 1995                         |
| P-74-D694                          | <i>MATa ade1-14 his3-Δ200 ura3-52 leu2-3,112 trp1-289 [PSI<sup>+</sup>] [PIN<sup>+</sup>]</i>                                        | Drozdova et al., 2016                         |
| 2-74-D694                          | <i>MATa ade1-14 his3-Δ200 ura3-52 leu2-3,112 trp1-289 [psi<sup>-</sup>] [pin<sup>-</sup>]</i>                                        | Matveenko et al., 2022                        |
| OT56                               | <i>MATa ade1-14 his3-Δ200 ura3-52 leu2-3,112 trp1-289 [PSI<sup>+</sup>]<sup>S</sup> [PIN<sup>+</sup>]</i>                            | Derkatch et al., 1997;<br>Newnam et al., 1999 |
| OT55                               | <i>MATa ade1-14 his3-Δ200 ura3-52 leu2-3,112 trp1-289 [PSI<sup>+</sup>]<sup>W</sup> [PIN<sup>+</sup>]</i>                            | Derkatch et al., 1997;<br>Newnam et al., 1999 |
| 2-OT56                             | <i>MATa ade1-14 his3-Δ200 ura3-52 leu2-3,112 trp1-289 [psi<sup>-</sup>] [pin<sup>-</sup>]</i>                                        | Matveenko et al., 2016                        |
| U-12-D1682                         | <i>MATa ade1-14 his3-Δ200 lys2 ura3-52 leu2-3,112 trp1-289 sup35::HIS3MX [psi<sup>-</sup>] [PIN<sup>+</sup>] [pRSU2]</i>             | Danilov et al., 2019                          |
| L-12-D1682                         | U-12-D1682 [pRSU1] (instead of [pRSU2])                                                                                              | This work                                     |
| mutMcm1-1L-12-D1682                | U-12-D1682 [pRSU1-mutMcm1-1] (instead of [pRSU2])                                                                                    | This work                                     |
| ΔMcm1-2L-12-D1682                  | U-12-D1682 [pRSU1-ΔMcm1-2] (instead of [pRSU2])                                                                                      | This work                                     |
| ΔMcm1-2*L-12-D1682                 | U-12-D1682 [pRSU1-ΔMcm1-2*] (instead of [pRSU2])                                                                                     | This work                                     |
| ΔMcm1-3L-12-D1682                  | U-12-D1682 [pRSU1-ΔMcm1-3] (instead of [pRSU2])                                                                                      | This work                                     |
| ΔMcm1-3mutAbf1L-12-D1682           | U-12-D1682 [pRSU1-ΔMcm1-3mutAbf1] (instead of [pRSU2])                                                                               | This work                                     |
| ΔMcm1-3mutMcm1-1L-12-D1682         | U-12-D1682 [pRSU1-ΔMcm1-3mutMcm1-1] (instead of [pRSU2])                                                                             | This work                                     |
| ΔMcm1-3ΔMcm1-2L-12-D1682           | U-12-D1682 [pRSU1-ΔMcm1-3ΔMcm1-2] (instead of [pRSU2])                                                                               | This work                                     |
| flipSfp1L-12-D1682                 | U-12-D1682 [pRSU1-flipSfp1] (instead of [pRSU2])                                                                                     | This work                                     |
| ΔSfp1L-12-D1682                    | U-12-D1682 [pRSU1-ΔSfp1] (instead of [pRSU2])                                                                                        | This work                                     |
| U-P <sup>S</sup> -A-GT671          | <i>MATa ade1-14 his3-Δ200 lys2 ura3-52 leu2-3,112 trp1-289 sup35::HIS3MX [PSI<sup>+</sup>]<sup>S</sup> [PIN<sup>+</sup>] [pRSU2]</i> | Matveenko et al., 2019                        |
| L-P <sup>S</sup> -A-GT671          | U-P <sup>S</sup> -A-GT671 [pRSU1] (instead of [pRSU2])                                                                               | This work                                     |
| mutMcm1-1L-P <sup>S</sup> -A-GT671 | U-P <sup>S</sup> -A-GT671 [pRSU1-mutMcm1-1] (instead of [pRSU2])                                                                     | This work                                     |
| ΔMcm1-2L-P <sup>S</sup> -A-GT671   | U-P <sup>S</sup> -A-GT671 [pRSU1-ΔMcm1-2] (instead of [pRSU2])                                                                       | This work                                     |

|                                                          |                                                                                                                                                          |                                                 |
|----------------------------------------------------------|----------------------------------------------------------------------------------------------------------------------------------------------------------|-------------------------------------------------|
| $\Delta$ Mcm1-2*L-P <sup>S</sup> -A-GT671                | U-P <sup>S</sup> -A-GT671 [pRSU1- $\Delta$ Mcm1-2*] (instead of [pRSU2])                                                                                 | This work                                       |
| $\Delta$ Mcm1-3L-P <sup>S</sup> -A-GT671                 | U-P <sup>S</sup> -A-GT671 [pRSU1- $\Delta$ Mcm1-3] (instead of [pRSU2])                                                                                  | This work                                       |
| $\Delta$ Mcm1-3mutAbf1L-P <sup>S</sup> -A-GT671          | U-P <sup>S</sup> -A-GT671 [pRSU1- $\Delta$ Mcm1-3mutAbf1] (instead of [pRSU2])                                                                           | This work                                       |
| $\Delta$ Mcm1-3mutMcm1-1L-P <sup>S</sup> -A-GT671        | U-P <sup>S</sup> -A-GT671 [pRSU1- $\Delta$ Mcm1-3mutMcm1-1] (instead of [pRSU2])                                                                         | This work                                       |
| $\Delta$ Mcm1-3 $\Delta$ Mcm1-2L-P <sup>S</sup> -A-GT671 | U-P <sup>S</sup> -A-GT671 [pRSU1- $\Delta$ Mcm1-3 $\Delta$ Mcm1-2] (instead of [pRSU2])                                                                  | This work                                       |
| flipSfp1L-P <sup>S</sup> -A-GT671                        | U-P <sup>S</sup> -A-GT671 [pRSU1-flipSfp1] (instead of [pRSU2])                                                                                          | This work                                       |
| $\Delta$ Sfp1L-P <sup>S</sup> -A-GT671                   | U-P <sup>S</sup> -A-GT671 [pRSU1- $\Delta$ Sfp1] (instead of [pRSU2])                                                                                    | This work                                       |
| w13-U-12-D1682                                           | <i>MATa adel-14 his3-<math>\Delta</math>200 lys2 ura3-52 leu2-3,112 trp1-289 sup35::HIS3MX [PSI<sup>+</sup>]<sup>w13</sup> [PIN<sup>+</sup>] [pRSU2]</i> | Danilov et al., 2019                            |
| L-w13-12-D1682                                           | w13-U-12-D1682 [pRSU1] (instead of [pRSU2])                                                                                                              | This work                                       |
| mutMcm1-1L-w13-12-D1682                                  | w13-U-12-D1682 [pRSU1-mutMcm1-1] (instead of [pRSU2])                                                                                                    | This work                                       |
| $\Delta$ Mcm1-2L-w13-12-D1682                            | w13-U-12-D1682 [pRSU1- $\Delta$ Mcm1-2] (instead of [pRSU2])                                                                                             | This work                                       |
| $\Delta$ Mcm1-2*L-w13-12-D1682                           | w13-U-12-D1682 [pRSU1- $\Delta$ Mcm1-2*] (instead of [pRSU2])                                                                                            | This work                                       |
| $\Delta$ Mcm1-3L-w13-12-D1682                            | w13-U-12-D1682 [pRSU1- $\Delta$ Mcm1-3] (instead of [pRSU2])                                                                                             | This work                                       |
| $\Delta$ Mcm1-3mutAbf1L-w13-12-D1682                     | w13-U-12-D1682 [pRSU1- $\Delta$ Mcm1-3mutAbf1] (instead of [pRSU2])                                                                                      | This work                                       |
| $\Delta$ Mcm1-3mutMcm1-1L-w13-12-D1682                   | w13-U-12-D1682 [pRSU1- $\Delta$ Mcm1-3mutMcm1-1] (instead of [pRSU2])                                                                                    | This work                                       |
| $\Delta$ Mcm1-3 $\Delta$ Mcm1-2L-w13-12-D1682            | w13-U-12-D1682 [pRSU1- $\Delta$ Mcm1-3 $\Delta$ Mcm1-2] (instead of [pRSU2])                                                                             | This work                                       |
| flipSfp1L-w13-12-D1682                                   | w13-U-12-D1682 [pRSU1-flipSfp1] (instead of [pRSU2])                                                                                                     | This work                                       |
| $\Delta$ Sfp1L-w13-12-D1682                              | w13-U-12-D1682 [pRSU1- $\Delta$ Sfp1] (instead of [pRSU2])                                                                                               | This work                                       |
| w32-U-12-D1682                                           | <i>MATa adel-14 his3-<math>\Delta</math>200 lys2 ura3-52 leu2-3,112 trp1-289 sup35::HIS3MX [PSI<sup>+</sup>]<sup>w32</sup> [PIN<sup>+</sup>] [pRSU2]</i> | Danilov et al., 2019                            |
| L-w32-12-D1682                                           | w32-U-12-D1682 [pRSU1] (instead of [pRSU2])                                                                                                              | This work                                       |
| mutMcm1-1L-w32-12-D1682                                  | w32-U-12-D1682 [pRSU1-mutMcm1-1] (instead of [pRSU2])                                                                                                    | This work                                       |
| $\Delta$ Mcm1-2L-w32-12-D1682                            | w32-U-12-D1682 [pRSU1- $\Delta$ Mcm1-2] (instead of [pRSU2])                                                                                             | This work                                       |
| $\Delta$ Mcm1-3L-w32-12-D1682                            | w32-U-12-D1682 [pRSU1- $\Delta$ Mcm1-3] (instead of [pRSU2])                                                                                             | This work                                       |
| $\Delta$ Mcm1-3mutMcm1-1L-w32-12-D1682                   | w32-U-12-D1682 [pRSU1- $\Delta$ Mcm1-3mutMcm1-1] (instead of [pRSU2])                                                                                    | This work                                       |
| $\Delta$ Mcm1-3 $\Delta$ Mcm1-2L-w32-12-D1682            | w32-U-12-D1682 [pRSU1- $\Delta$ Mcm1-3 $\Delta$ Mcm1-2] (instead of [pRSU2])                                                                             | This work                                       |
| U-GT671                                                  | <i>MATa adel-14 his3-<math>\Delta</math>200 lys2 ura3-52 leu2-3,112 trp1-289 sup35::HIS3MX [psi<sup>-</sup>] [pin<sup>-</sup>] [pRSU2]</i>               | Danilov et al., 2019                            |
| L-GT671                                                  | U-GT671 [pRSU1] (instead of [pRSU2])                                                                                                                     | This work                                       |
| flipSfp1L-GT671                                          | U-GT671 [pRSU1-flipSfp1] (instead of [pRSU2])                                                                                                            | This work                                       |
| $\Delta$ Sfp1L-GT671                                     | U-GT671 [pRSU1- $\Delta$ Sfp1] (instead of [pRSU2])                                                                                                      | This work                                       |
| U-1A-D1628                                               | <i>MATa adel-14 his3-<math>\Delta</math>200 lys2 ura3-52 leu2-3,112 trp1-289 sup45::HIS3MX [psi<sup>-</sup>] [PIN<sup>+</sup>] [pRS316-SUP45]</i>        | Moskalenko et al., 2003; Barbitoff et al., 2021 |

|                       |                                                                                                                                 |                                       |
|-----------------------|---------------------------------------------------------------------------------------------------------------------------------|---------------------------------------|
| L-1A-D1628            | U-1A-D1628 [pRS315-SUP45] (instead of [pRS316-SUP45])                                                                           | Moskalenko et al., 2003;<br>This work |
| flipSfp1L-1A-D1628    | U-1A-D1628 [pRS315-SUP45-flipSfp1] (instead of [pRS316-SUP45])                                                                  | This work                             |
| 105L-1A-D1628         | U-1A-D1628 [pRS315-sup45-105] (instead of [pRS316-SUP45])                                                                       | Moskalenko et al., 2003               |
| 107L-1A-D1628         | U-1A-D1628 [pRS315-sup45-105] (instead of [pRS316-SUP45])                                                                       | Moskalenko et al., 2003               |
| 113L-1A-D1628         | U-1A-D1628 [pRS315-sup45-105] (instead of [pRS316-SUP45])                                                                       | Matveenko et al., 2016                |
| 115L-1A-D1628         | U-1A-D1628 [pRS315-sup45-105] (instead of [pRS316-SUP45])                                                                       | Matveenko et al., 2016                |
| P1-U-1A-D1628         | <i>MATa ade1-14 his3-Δ200 lys2 ura3-52 leu2-3,112 trp1-289 sup45::HIS3MX [PSI<sup>+</sup>] [PIN<sup>+</sup>] [pRS316-SUP45]</i> | Matveenko et al., 2022                |
| L-P1-1A-D1628         | P1-U-1A-D1628 [pRS315-SUP45] (instead of [pRS316-SUP45])                                                                        | This work                             |
| flipSfp1L-P1-1A-D1628 | P1-U-1A-D1628 [pRS315-SUP45-flipSfp1] (instead of [pRS316-SUP45])                                                               | This work                             |
